# Supplementary material for: Joint effect of alcohol drinking and tobacco smoking on all-cause mortality and premature death in China: A cohort study
Source: PubMed Central journal article supplement (PMC7842879; doi:10.1371/journal.pone.0245670), 2021-01-28
Supplement: pone.0245670.s006.pdf [file pone.0245670.s006.pdf]

This document certifies that the manuscript

## Joint effect of alcohol drinking and tobacco smoking on all-cause mortality and premature death in China: a cohort study

prepared by the authors

**Zhang Hongli, Bi Xueyuan, Zheng Nanbo, Chao Li, Yan Kangkang**

was edited for proper English language, grammar, punctuation, spelling, and overall style by one or more of the highly qualified native English speaking editors at AJE.

This certificate was issued on **November 4, 2020** and may be verified on the [AJE website](#) using the verification code **3B9A-8300-F249-DD72-9A3E**.

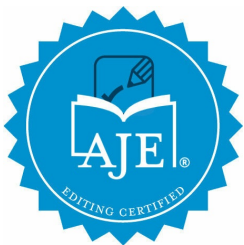

Neither the research content nor the authors' intentions were altered in any way during the editing process. Documents receiving this certification should be English-ready for publication; however, the author has the ability to accept or reject our suggestions and changes. To verify the final AJE edited version, please visit our verification page at [aje.com/certificate](#). If you have any questions or concerns about this edited document, please contact AJE at [support@aje.com](mailto:support@aje.com).
